# Supplementary material for: A Day in the Life of Microcystis aeruginosa Strain PCC 7806 as Revealed by a Transcriptomic Analysis
Source: PubMed Central journal article supplement (PMC3023806; doi:10.1371/journal.pone.0016208), 2011-01-19

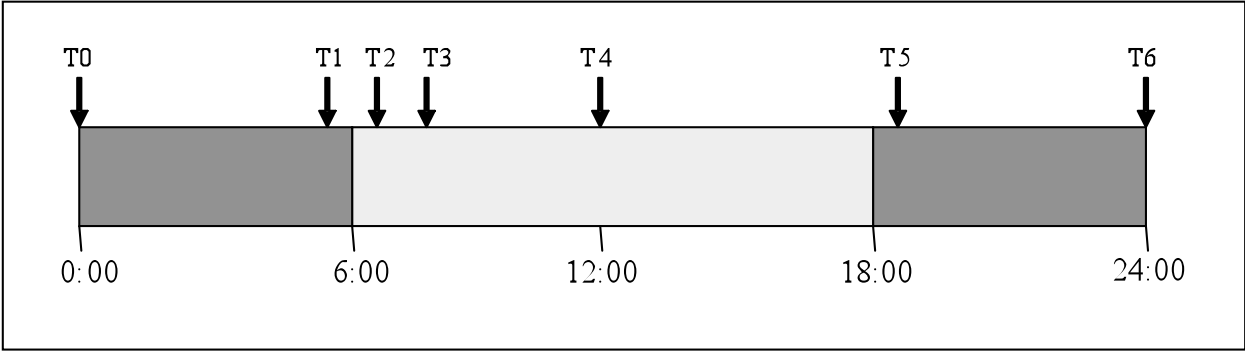

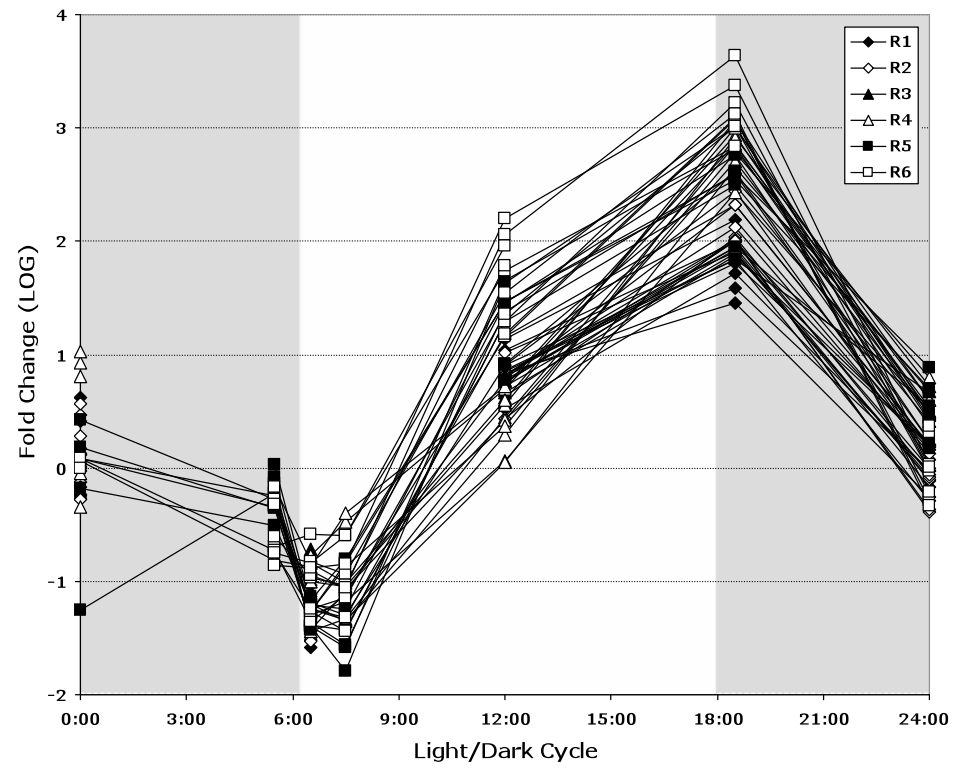

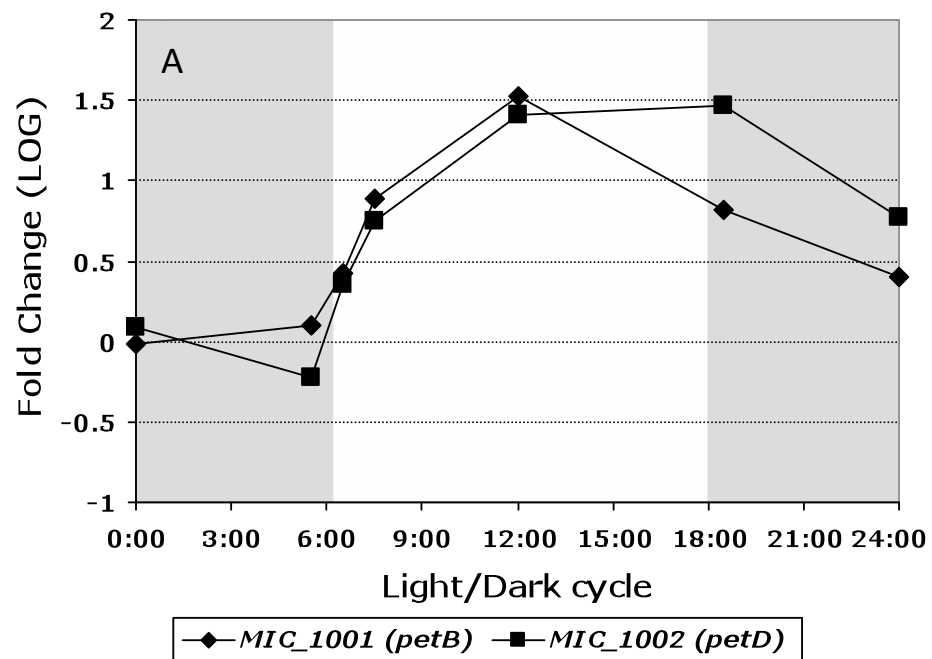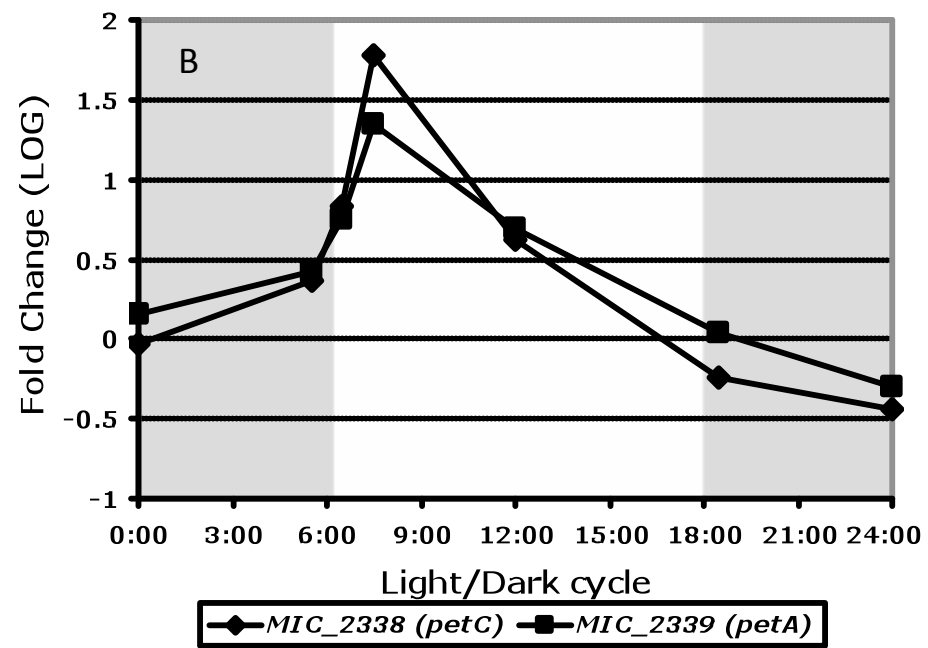

Supplement: pone.0016208.s003.pdf [file pone.0016208.s003.pdf]
